1 **Introducing ExHiBITT – Exploring Host microbiome inTeractions in Twins-, a colon**  
2 **multiomic cohort study**

3 Marina Mora-Ortiz<sup>1#</sup>, Hajir Ibraheim<sup>2#</sup>, Sherine Hermangild Kottoor<sup>2</sup>, Ruth C. E. Bowyer<sup>1</sup>, Sarah  
4 Metrustry<sup>1</sup>, Jeremy Sanderson<sup>3</sup>, Nicholas Powell<sup>2</sup>, Tim D. Spector<sup>1</sup>, Kerrin S. Small<sup>1</sup>, Claire J.  
5 Steves<sup>\*1</sup>

6 <sup>#</sup>Joint first authors

7 <sup>1</sup> The Department of Twin Research and Genetic Epidemiology, King's College London, St  
8 Thomas' Hospital, Lambeth Palace Road, London, SE1 7EH, UK;

9 <sup>2</sup> Experimental Immunobiology, Division of Transplant Immunology and Mucosal Biology,  
10 Great Maze Pond, King's College London, SE1 9RT, UK;

11 <sup>3</sup> Department of Gastroenterology, Guy's & St. Thomas' Hospitals NHS Foundation Trust,  
12 London, United Kingdom\*

13 Corresponding authors\*: Claire Steves [Claire.steves@kcl.ac.uk](mailto:Claire.steves@kcl.ac.uk) and Kerrin Small  
14 [Kerrin.small@kcl.ac.uk](mailto:Kerrin.small@kcl.ac.uk)

15 **Abstract:**

16 The colon is populated by approximately 10<sup>12</sup> microorganisms, but the relationships between this  
17 microbiome and the host health status are still not completely understood. Participants from the  
18 TwinsUK cohort were recruited to study the interactions between the microbiome and host  
19 adaptive immunity. In total, 205 monozygotic twins were recruited from the wider TwinsUK  
20 cohort. They completed health questionnaires, and provided saliva, blood, colon biopsies from  
21 three different locations, caecal fluid, and two faecal- samples.

22 Here, our objective is to present the cohort characteristics of **ExHiBITT** including i)  
23 biomedical phenotypes, ii) environmental factors and ii) colonoscopic findings. A significant  
24 proportion of this apparently normal cohort had colonic polyps (28%), which are of interest as  
25 potential precursors of colorectal cancer, and as expected, the number of polyps found was  
26 significantly correlated with BMI and age. Hitherto undiagnosed diverticulosis was also not

27 infrequently found during colonoscopy (26%) and was associated in changes in Hybrid Th1-17  
28 cells in the colon. Twin proband cooccurrence rate for diverticulosis (82%), was much higher  
29 than for polyps (42%). Familial factors affecting morphology or tolerance may contribute to the  
30 ease of endoscopy, as both the time to reach the caecum, and pain perceived were highly  
31 concordant (proband concordance: 85% and 56% respectively). We found the expected positive  
32 relationship between BMI and colonoscopic anomalies such as diverticular disease and polyps in  
33 the whole population, but within twin pairs this association was reversed. This suggests that  
34 familial factors confound these associations. Host and microbial Next Generation Sequencing  
35 and metabolomics of the samples collected are planned in this cohort.

36 **Key words:** cohort profile, twins, colon, microbiome, host genetics, polyps, diverticulosis

### 37 **Introduction**

38 The colon, is the last part of the digestive system where water, salt and some vitamins, such as  
39 vitamin K or thiamine, are absorbed prior to defaecation. It is also a key location where  
40 microbial fermentation of remaining solid waste material takes place (1-3). The large intestine is  
41 populated by approximately  $10^{12}$  microorganisms, out of the circa  $10^{14}$  microorganisms hosted in  
42 different niches of the human body including skin, genitourinary and respiratory tracts, and small  
43 and large intestine (4-7). Over 700 different species live in the colon, prevalently dominated by  
44 Firmicutes and Bacteroides, with a varying ratio depending on different factors including health  
45 status (8-11). Interactions between the microbiota and the colon can be classified as mutualistic,  
46 symbiotic or pathobiontic (12, 13) and evidence is mounting for a role in host health and disease.  
47 Most human studies to date investigate the relationship between faecal samples and host  
48 physiology. However, animal studies have indicated tighter relationships between colonic  
49 microbiota and host physiology than with the stool, and highlighted the influence of microbiota  
50 on colonic gene expression (14).

51 ExHiBITT – Exploring Host microBIome inTeration in Twins- is a sub-study within TwinsUK  
52 cohort (15, 16), which will enable scientist access to a large number of OMICS' data related to

53 the colon. Twin studies may particularly useful to study deep-tissue microbiota-host interactions,  
54 in part because of the strong influence of host genetics on gene expression and immune function  
55 disease associations, and to a lesser extent on microbiome itself (17-20). By analysing changes in  
56 monozygotic twins, with the same host genetics, effects of different microbiota can be examined  
57 without the variance attributable to host genetics. Thus, twins' studies are recognised for their  
58 potential to investigate different phenotypes separating genetic from environmental effects (21).  
59 Monozygotic (MZ) twin pairs, where genetic variation is rare or null, provide the ideal scenario  
60 to investigate the effect of environmental factors such as gut microbiota, diet, smoking status or  
61 living habitat (22, 23). Analysis of samples, using high-throughput techniques, including Next  
62 Generation Sequencing (NGS), metabolomics and immune profiling of peripheral blood and  
63 caecum of twin pairs, is underway to investigate the host and microbiome genetics, metabolome  
64 and associated modulations of the immune system.

65 The objective of the present study was firstly to describe the distribution of this newly  
66 established cohort according to three different types of phenotypes: i) colonoscopy findings, ii)  
67 biomedical phenotypes and iii) environmental factors, and to assess the twin concordance for  
68 endoscopic variables. We then interrogated the relationships between BMI and colonoscopic  
69 findings using standard and within-pair regression modelling. Secondly, although routine  
70 endoscopic biopsies are considered safe, there is limited outcome data in patients that have large  
71 numbers of research biopsies taken, and where available is retrospective in nature (24). In this  
72 study we report on the safety and tolerability of taking more than 20 research biopsies within an  
73 older adult population.

74 Analysis of the colonoscopic findings found within this non-clinical population are not trivial.  
75 Polyps are tumours affecting approximately half of the western population at some point in life  
76 and detected in up to a third of all colonoscopies (25). The majority of polyps are adenomatous  
77 and, by definition, dysplastic with malignant potential. Adenomatous polyps increase with age,  
78 occurring in 21-28% 50-59 year olds, 41-45% in 60-69 year olds, and 53-58% in patients over 70

79 (26). Dysplastic polyps which are left undetected can develop into colorectal cancer (CRC), the  
80 third most prevalent cancer worldwide (27-30). There is interest, therefore, in understanding the  
81 development of polyps as a precursor of cancer. Diverticular disease is the symptomatic  
82 manifestation (normally abdominal pain) of people who have develop diverticula, which are  
83 small bulges in the large intestine (31). Approximately 1 every 4 people with will develop  
84 diverticulitis, which is the inflammation lead by bacteria and is associated with increased risk of  
85 intestinal perforation (32).

## 86 **Material and Methods:**

### 87 **Study ethical approval and participants consent**

88 The ethics of this study were approved by the English National Health Service (NHS) Research  
89 Ethics Committee in June 2015. Participants provided informed written consent after  
90 registration and hold the right to drop out at any point of the study.

### 91 **Recruitment**

92 The TwinsUK ExHiBITT – Exploring Host microBIome inTeraction in Twins- cohort was  
93 established between 2015 and 2018 to study interactions between colon microbiota and host  
94 genomics. Twins were recruited from the TwinsUK cohort with the eligibility criteria outlined in  
95 Supplementary\_material\_1.

96 Individuals who fell under this criterion were contacted by email. As the focus of our study was  
97 healthy ageing, individuals were recruited from older age bands preferentially.

### 98 **Data and sample collection**

99 This cohort was annotated for three different types of phenotypes described in  
100 Supplementary\_material\_2.

101 Living area was assigned by extracting Land Cover Map (LCM) 2015 1 km target class for each  
102 of the participant's postcode using R package 'raster' and 'rgdal'. LCM classes were then  
103 reassigned as urban, suburban or rural. Phenotypes were assessed thought self-reported  
104 questionnaires in all cases except for weight and height in BMI, which were measured the day of

105 the visit. SocioEconomic Status (SES) was based on postcode location and assigned using  
106 published deciles of the Index of Multiple Deprivation (IMD) for Scotland, Wales, England and  
107 northern Ireland, where 1 is the most deprived and 10 is the least deprived (33). Frailty index was  
108 annotated as described in Searle *et al.* (2008) (34).

109 Every patient underwent a colonoscopy, using the same bowel preparation (sennakot and  
110 sodium picosulphate). Colon biopsies were taken at colonoscopies from up to four locations  
111 (right colon, left colon, terminal ileum and cecum), caecal fluid, saliva and blood samples were  
112 collected at time of visit (Supplementary\_material\_3). Stool samples were taken 24 hours prior,  
113 before bowel preparation, and also at more than one week after the visit.

114 Data recorded just before commencing colonoscopy included presence/absence of irritable  
115 bowel syndrome (IBS), and presence/absence of a history of abdominal pain, loose stool or  
116 constipation. Phenotypic information collated during colonoscopy included endoscopic findings  
117 (i.e. polyps and location and number of areas containing diverticulae), pain scores as assessed by  
118 the endoscopist using the modified Gloucester scale (35) (1= comfortable, 5= frequent  
119 discomfort with significant distress), quality of bowel preparation and time to caecum.  
120 Histological outcomes from clinical biopsies of lesions were collated after the procedure.

### 121 **Immune profiling from peripheral blood and biopsies**

122 Peripheral blood mononuclear cells (PBMC) were isolated using ficoll-paque density gradient  
123 centrifugation method. Multi-parametric flow cytometry was performed after staining with  
124 relevant fluorescent monoclonal antibodies to quantify T cell. Effector memory T-cells were  
125 identified as  $CD3^+CD4^+CD25^-CD45RO^+CD45RA^-CCR7^-$ , which then subsequently defined Th1  
126 ( $CXCR3^+CCR6^-$ ), Th17 ( $CXCR3^-CCR6^+$ ), Th1-17 hybrid ( $CXCR3^+CCR6^+$ ) and Th2 ( $CXCR3^-$   
127  $CCR6^-CCR4^+$ ) cells. Antigen experienced regulatory T cells (Ag Exp Treg) were defined as  
128  $CD3^+CD4^+CD25^+CD45RA^-CCR4^+$  which were then subdivided into T helper like subsets based  
129 on CCR6 and CXCR3 expression (Figure 1, panel a): 1A).

130 Endoscopically acquired colonic biopsies were sampled and partially disrupted by gently  
131 compressing the epithelial/luminal aspect of the biopsy into the foam matrix. Complete culture  
132 medium (supplemented with rhIL2, broad spectrum antibiotics and anti-fungal reagents) was  
133 added and immune cells progressively migrated out of tissue into the culture medium. Cells were  
134 harvested after 48 hours for downstream analysis. Leukocyte yield using this system was typically  
135 in the region of  $2 \times 10^5$  cells per biopsy. The cells were then stimulated with PMA and ionomycin  
136 for 3 hours and analysed by intracellular cytokine staining and flow cytometry. T helper cell  
137 subsets were defined as Th1 (IFN- $\gamma^+$ IL-17 $^-$ ), Th17 (IFN- $\gamma$ IL-17 $^+$ ), and Th1-17 (IFN- $\gamma^+$ IL-17 $^+$ )  
138 cells. (Figure 1, panel b): 1B)

139 The data for each type of cell was calculated as a percentage of parent cell population and  
140 analysed using graphpad prism software.

#### 141 **Statistical analysis**

142 **Descriptive statistics** for sex, rearing, ethnicity, smoking status, living area and  
143 socioeconomic status as well as polyp presence) and measured variables (BMI, age and frailty)  
144 were calculated using RStudio (version 0.99.489 – © 2009-2015 RStudio, Inc).

145 For the concordance analysis of colonic traits, twin pairs where one of the individuals had  
146 missing information were removed. The formula employed was:  $CR_{pairwise} = (Number\ of\ concordant\ pairs / (Number\ of\ concordant\ pairs + number\ of\ discordant\ pairs)) * 100$  and  $CR_{proband} = (2 * Number\ of\ concordant\ pairs / ((2 * Number\ of\ concordant\ pairs) + number\ of\ discordant\ pairs)) * 100$ .

149 **Inferential statistics** were employed to interrogate the cohort through Linear Mixed Effect  
150 Models (LMEM) using the algorithm provided in the R package lme4 (36). The model employed  
151 was:  $lmer(Trait \sim Frailty + Age + BMI + Quality\_of\_bowel\_prep + (1 | Family\_No))$ , where the  
152 random effects were the biological variates (frailty, age and BMI) and a technical covariate  
153 (quality of bowel preparation). The fixed effect was family relatedness. The traits studied were  
154 the four colonoscopy-derived phenotypes previously described. Moreover, a second model:  
155  $lmer(Time\_to\_caecum \sim Pain\_score + Endoscopist + AbdSym\_including\_IBS + Quality\_of\_bowel\_prep$

156 + Age + Frailty + BMI + (1 | Family\_No) was employed to identify any connexion between time  
157 to caecum and the phenotypes measured. Bonferroni correction was applied to all the results  
158 obtained from the statistical analysis.

159 Differences in *between* and *within* variation in twin pairs were studied using a linear model. The  
160 model used was:  $lmer(\text{Trait} \sim \text{BMI}^b + \text{BMI}^w + \text{Frailty}^b + \text{Frailty}^w + (1 | \text{Family\_No}))$ , where  $^b$   
161 (*between*) denotes the mean for the trait in each family group, and  $^w$  (*within*) the difference  
162 between individuals and the family mean for each pair. Statistical difference in the *between* and  
163 *within* coefficients for each trait was calculated using LINear COMBination of estimators  
164 (LINCOM), implemented in STATA, where the model was reiterated.

### 165 **Data availability**

166 Data produced during the colonoscopy study will be publicly available through managed access.  
167 Researchers interested can request access following TwinsUK procedure available at TwinsUK  
168 Data Access Policy (<http://twinsuk.ac.uk>).

## 169 **Results and discussion:**

### 170 **1. Recruitment**

171 Two hundred and five twins volunteered for the study; out of those, two hundred successfully  
172 completed the colonoscopy. Withdrawals were linked to the discovery of a suspected cancer  
173 (n=3) or voluntary discontinuation during the intervention due to discomfort (n=2).

### 174 **2. Samples collection**

175 Colon biopsies were collected for interrogation of host genomics and microbiome analysis (data  
176 not reported here). Samples were conserved in liquid nitrogen and included biopsies from i) left  
177 colon (n=196), ii) terminal ileum (n=151), iii) caecum (n=73), and right colon (n=24) when one  
178 of the other locations was difficult to sample. Mucosal biopsies to be used for microbial analysis  
179 were conserved at -80°C. This included i) left colon (n=200), ii) right colon (n=179) and iii)  
180 caecum (n=79). Colon biopsies were taken in triplicates. In total, 5 replicates of caecal fluid were  
181 collected during the colonoscopy (n=197). Faecal samples were collected immediately prior to

182 bowel preparation (n=169), and one week after (n=188). Other samples included saliva (n=180)  
183 and blood (n=204), which was stored as serum and plasma.

### 184 **3. Cohort descriptive statistical analysis**

185 The average age of the cohort was  $58.70 \pm 9.55$  (F= $58.60 \pm 9.52$ , M= $59.04 \pm 9.38$ ), BMI was  
186  $26.37 \pm 5.22$  (F= $26.01 \pm 5.18$ , M= $27.66 \pm 5.21$ ), and frailty index  $0.18 \pm 0.10$  (F= $0.19 \pm 0.10$ ,  
187 M= $0.17 \pm 0.09$ ) (Supplementary\_material\_4, panel a). Twin pairs where differences between  
188 continuous traits (i.e. BMI, frailty index and EIMD deciles was bigger than 1 standard deviation  
189 were considered discordant (Supplementary\_material\_4, panel b). One twin pair was found  
190 discordant for BMI, and 2 for frailty. In total, 39 twin pairs were found discordant for EIMD  
191 decile. The twin pair with discordant BMI and frailty was also discordant for EIMD deciles.

192 In total, there were one hundred and sixty-one women and forty-four men in the cohort. Only  
193 four individuals (2%) were reared apart. Ninety-five percent of the individuals identified  
194 themselves as white, 2% as mixed, 2% as black and 1% as Asian. Five percent of twins could not  
195 attend the colonoscopy visit with their co-twins, and one individual's twin dropped out from the  
196 study just before the visit. Smokers represented 26% of the cohort, 66% of individuals never  
197 smoked and 3% considered themselves as ex-smokers. Currently, 55% of the cohort live in the  
198 same county as their co-twin. Fifty-nine percent of the cohort live in sub-urban areas, 28% in  
199 rural areas and 11% in urban areas. Regarding socioeconomic status, 8% of the cohort were  
200 classified as belonging to IMD decile 1-2, 15% to SES 3-5, 42% to SES 6-8 and 35% to SES 9-  
201 10 where 10 is the least deprived (Supplementary\_material\_4, panel c).

202 In total, colonoscopy information from 196 individuals was collected. This information is next  
203 described following the time sequence of the data collection and from specific to accumulative  
204 phenotypic traits.

#### 205 ***Pre-procedure outcomes***

206 Twenty individuals (13%) reported irritable bowel syndrome (IBS), with a concordance rate of  
207 50% (proband) respectively. Everybody with IBS reported one type or another of abdominal



208 symptom. The different types of symptoms recorded were: i) pain/cramps (n=26), ii)  
209 constipation (n=22), iii) rectal bleeding (n=2), diarrhoea (n=7) and alternative  
210 diarrhoea/constipation (n=6). The accumulative trait '*presence of abdominal symptoms or IBS*'  
211 counted for 40 individuals (28%) affected by at least one symptom. The pairwise concordance  
212 rate was 48%, and the proband was 65% (Table 1). The influence of genetic and environmental  
213 factors on the emergence of IBS has been the subject of considerable debate, with increasing  
214 evidence that supports a role for genetic susceptibility. Our findings on concordance rates, is  
215 slightly higher than other MZ twin studies which have showed concordance rates between 17%  
216 and 33%(37-39).

### 217 ***Procedure related outcomes***

218 Out of the 196 individuals with colonoscopy information, 4 of them had poor bowel  
219 preparation, 25 adequate and the rest had good bowel preparation. **Quality of bowel**  
220 **preparation** was used in the LMEM as a potential confounder.

221 **Sedation** provided included midazolam, fentanyl, endotox or nothing. The medication index  
222 was created considering the following factors: i) 1 mg of Midazolam= 1 index unit, ii) 25 µcg of  
223 Fentanyl = 1 unit, and iii) Endotox use = 1 index unit. Sedation scores ranged from 1-6, average  
224  $3.8 \pm 2.1$ . 15 twin pairs were discordant by more than one SD, giving a proband concordance  
225 rate equal to 91% (Table 1). These concordances should be taken with caution, as the  
226 endoscopist was not blinded to twin pairing. Concordant twin pairs for sedation were selected to  
227 study **pain scores** associations with time to caecum.

228 Two different types of pain traits were used, the original pain score taken during the  
229 colonoscopy and the predicted pain score adjusted taking into account the sedation. For that  
230 purpose, a Linear Mixed Effect Model ( $Pain\_score \sim Sedation\_score + (1 | Family)$ ) was built in R to  
231 calculate the residuals from pain score taking into account family and sedation. Concordance  
232 rates were calculated in both traits, but only *Pain\_score* of concordant twins for *Sedation\_score* was  
233 used in the model to calculate associations with time to caecum. The minimum pain score was 0,

234 and -1.19 in the predicted pain score. The maximum were 5 and 2.45 units respectively. The  
235 average pain score was  $1.58 \pm 0.79$ , and  $0.003 \pm 0.60$  for the predicted pain score. The proband  
236 concordant rate for pain score was 56% and 59% for the predicted pain score (Table 1).

237 Time to caecum was in average  $12.97 \pm 7.12$  min, maximum time to caecum was 52 minutes and  
238 minimum 1.33. There were 64 concordant pairs and 21 discordant by more than one standard  
239 deviation. The concordance rate was 86% (proband)(Table 1). This minimal variation between  
240 twins in caecal intubation time, suggests that technical difficulty and by inference colonic  
241 morphology, was similar. Although this is not an entirely unexpected finding, it has not been  
242 previously described in MZ twin colonoscopies. Focussing only on those individuals with  
243 **polyps and/or diverticulosis**, in total 93 of them had one condition or both. Individuals had  
244 between 0 to 4 total polyps and/or diverticulosis in total (Supplementary\_material\_5, panels b, f  
245 and j). The proband concordance rate for polyps and/or diverticulosis was 74% (Table 1). This  
246 concordance is illustrated in Supplementary\_material\_6.

247 Fifty-seven people had colonic **polyps** (28%), one of them had a potential cancer and  
248 appropriate actions were taken. The number of polyps ranged from multiple (>7) to 1 (average  
249 where present 1.5), (Supplementary\_material\_5, panels c, g and k). The concordance rate for  
250 polyps was 42% (proband). Only 4 pairs were concordant for tubular adenomas, the rest of the pairs  
251 discordant (n=29), giving a proband concordance rate of 22%.

252 Despite the fact that known **diverticular disease** was an exclusion for the study (due to the  
253 increased risk of bowel perforation), 51 people were found to have diverticulosis on endoscopy  
254 (26%), of which the majority (29) where located in the left colon. The number of locations for  
255 diverticulae within an individual ranged from 0 to 2. No individuals had evidence of inflamed  
256 diverticulae (diverticulitis). Twenty-one twin pairs (n=42) were concordant for diverticulosis and  
257 nine cases (n=9) were discordant (Fig 3, panels: I, j, k, and i). Thus, *diverticulosis* had the highest  
258 concordance between twins at 82% (proband) (Table 1, Supplementary\_material\_6).

259 In a previous twin cohort study from the Swedish Twin Registry, the MZ concordant rate for  
260 diverticulosis was 6% only, due to the fact there were over fourteen fold times more discordant  
261 twins for diverticulosis than concordant ones (40). Similarly, the diverticulosis study from the  
262 Danish Twin Registry found that the diverticulosis twin concordance rate was 8% (40, 41).  
263 Differences between these studies and the results from the colonoscopy TwinsUK is most likely  
264 to be a function of ascertainment. Our participants were selected not to have a known diagnosis  
265 of diverticulosis, and presence was ascertained endoscopically. Whereas these other studies relied  
266 on health record data from physician diagnosis and asymptomatic co-twins may not have  
267 undergone a colonoscopy. Alternatively there could come from environmental and genetic  
268 variation between Scandinavian and British populations, or differences in advances in the  
269 colonoscopy techniques (where employed), cohort size and recruitment criteria and timing of the  
270 study (the Swedish Twin Registry took data from 1886 to 1980, and the Danish went from 1977  
271 to 2011, while the TwinsUK colonoscopy study examined volunteers between 2015 and 2018).  
272 Heritability of diverticular disease has been estimated by Strate and colleagues (2013) (42) as  
273 53%, which could be an underestimate due to asymptomatic disease. To the best of our  
274 knowledge, the high endoscopic concordance rate for diverticulosis in identical twins identified  
275 in this cohort was never reported before. This indicates that genetic variants could contribute to  
276 the development of diverticulosis, as previously indicated.

### 277 **Complications**

278 Despite the large number of samples collected, there were no major complications, including  
279 perforation or bleeding. Minor complications included incomplete procedures secondary to  
280 patient discomfort (n=2) or presence of a fixed sigmoid that limited endoscopic progression.  
281 One 61year-old patient who received sedation experienced a transient vasovagal episode during  
282 the procedure.

### 283 ***Post-procedure related outcomes***

284 One hundred and four individuals had some sort of **abnormality** in the mucosa observed either  
285 during the colonoscopy or at histology. Individuals with presence of any abnormality represented  
286 51% of the cohort, 45% of the cohort was absent of any sort of abnormality and the remaining  
287 are those individuals with no colonoscopy information available (N/A). Abnormalities ranged  
288 from 0 to 4 (Supplementary\_material\_5, panels a, e and i). Twenty-one twin pairs (n=42) were  
289 discordant for any abnormality, and 41 twin pairs were concordant. This gave a concordant rate  
290 of 80% (proband).

#### 291 **4. Cohort inferential statistical analysis**

292 A LMEM was used to interrogate if our colonoscopy traits were associated with biological  
293 covariates (i.e. BMI, age, frailty). Results from the LMEM showed that age and BMI were  
294 statistically significant according to i) *total number of abnormalities*, ii) *total number of polyps and*  
295 *diverticulosis*, and iii) *total number of polyps*. Total number of diverticulosis was only relatively closed  
296 to be significant in the case of BMI (Supplementary\_material\_7, Table 2). There was no  
297 detectable association between time to caecum and biological covariates.

298 Furthermore, between family (*b*) and within pair (*w*) twin differences for BMI and frailty index  
299 were studied using linear models. No significance was found for frailty. Reflecting the results  
300 above, and consistent with previous published studies (43-46), BMI<sub>*b*</sub> was statistically significant  
301 in all the traits studied such that higher BMI led to greater risk of anomalies. BMI difference  
302 within pairs was significantly different from the between family difference in all four tests and  
303 showed significant opposite relationship in the traits i) *total number of polyps*, and ii) *total number of*  
304 *polyps and/or diverticulosis*, i.e. higher BMI within pairs led to reduced risk of anomalies. This could  
305 indicate common factors to both twins, such as genetics and early life environment, could be the  
306 link between with BMI and the colonoscopy traits studied such as polyps (Table 3), rather than  
307 BMI being directly causal. This is intriguing given the evidence of host genetic factors impacting  
308 the gut microbiome (47), and obesity (48). Only a minority of studies have looked at microbiome  
309 as a potential biomarker associated with the development of polyps in healthy individuals (30, 46,

310 49). Further work with ExHiBITT will consider microbiome composition in relationship to  
311 polyps and diverticular disease.

### 312 **Immune profiling outcomes**

313 The twin pairs were highly concordant for different T cell subsets in both blood (Figure 2, panel  
314 a) and gut (Figure 3, panel a). Preliminary analysis showed differences in the immune response  
315 between males and females such as increased CD4 proportion and reduced antigen experienced  
316 Treg in females (not shown). Interestingly we found increased proportion of Th17 and Th2 cells  
317 in the peripheral blood in autumn-winter seasons compared to spring- summer seasons (Figure  
318 2, panel b). No marked differences were seen in the peripheral blood immune profile in traits  
319 such as polyp or diverticulosis. However, increased proportion of hybrid Th1-17 cells producing  
320 both IFN gamma and IL-17 were found in colonic biopsies from patients with diverticulosis  
321 (Figure 3, panel b). No differences were found in the gut immune profile of individuals  
322 with/without polyps. Since generation of effector T-cell responses has been shown to be  
323 dependent on the composition of the intestinal microbiota, it will be interesting to look at the  
324 microbiome driving these differences in our cohort.

### 325 **Conclusions:**

326 This cohort represents a great potential to study microbiome-host interactions in the colon, and  
327 their implications for the host immune system. The cohort is annotated for a large number of  
328 phenotypes representative of UK society. Preliminary findings showed that polyps are strongly  
329 correlated with BMI and age, but that the relationship with BMI may be confounded by factors  
330 genetics and other factors shared by twins. There is a high rate of concordance between twin  
331 pairs for diverticulosis, less so for polyps. Interestingly, similar intubation times and pain scores  
332 were found for twin pairs, which could indicate that familial factors determine the ease of  
333 colonoscopy for both the endoscopist and patient. Further studies will include the high

334 throughput analysis of the samples. We have also successfully phenotyped immune profile from  
335 the blood and gut of healthy twin pairs. High rate of concordance was found among twin pairs  
336 for effector and regulatory T cell subsets highlighting genetic control of immune response in  
337 monozygotic twins whereas seasonal variations found in the proportion of effector cell subsets  
338 ascertains the environmental programming of immune responses. Hybrid Th1-17 cells in the gut  
339 were shown to be associated with diverticulosis. Further analysis of this cohort will reveal the  
340 ileal microbiota responsible for driving systemic and mucosal immune response.

#### 341 **Abbreviations**

342 BMI, Body Mass Index

343 MZ, Monozygotic

344 NGS, Next Generation Techniques

345 NHS, National Health Service

346 SES socioeconomic status

#### 347 **Declarations**

348 The authors declare they do not have conflict of interest.

#### 349 **Acknowledgments**

350 The authors thank the twins for their participation in the study, and the Medical Research  
351 Council (MRC) for funding this research (RE10740). We also wish to thank Clare Stockwell,  
352 Rachel Horsfall and Isabelle Granville Smith from the Microbiome Project, and Genevieve  
353 Lachance, Darioush Yarand and Merve Demiroglu from IT/Data & Administration resources,  
354 King's College, University of London, for their technical assistance. Finally, we would also like to  
355 thank to Dr Julia El-Sayed Moustafa for the advice provided with the statistical models.

#### 356 **Funding**

357 This work was supported by a Medical Research Council (MRC) grant [grant number RE10740].

358 The TwinsUK study was funded by the Wellcome Trust and European Community's Seventh  
359 Framework Programme (FP7/2007-2013). The TwinsUK study also receives support from the

360 National Institute for Health Research (NIHR)- funded BioResource, Clinical Research Facility  
 361 and Biomedical Research Centre based at Guy's and St Thomas' NHS Foundation Trust in  
 362 partnership with King's College London.

363 **Authors' contributions**

364 MMO wrote the first draft of the manuscript, compiled the metadata and created the figures. HI  
 365 contributed to collect colonoscopy data and contribute to the gastroenterological aspects of the  
 366 manuscript. SHK carried out all the immunological analysis and contribute to write the  
 367 manuscript. RB compiled the metadata related to socioeconomic status, frailty and geographical  
 368 location. NP conducted the colonoscopies. TS, KS and CS conceived the idea and supervised  
 369 the work. All authors contributed to the experimental plan, supervised the work and contributed  
 370 to write the manuscript. All authors have approved the final manuscript.

371 **List of tables:**

372 **Table 1.** Concordance rate expressed in percentage.

| Trait                     | C  | D  | T  | Concordant rate % (pairwise)<br>(C/(C+D))*100 | Concordant rate<br>(proband)<br>(2C/(2C+D))*100 |
|---------------------------|----|----|----|-----------------------------------------------|-------------------------------------------------|
| Any abnormality in mucosa | 41 | 21 | 62 | 66%                                           | 80%                                             |
| P and/or Di               | 34 | 24 | 58 | 59%                                           | 74%                                             |
| Polyps                    | 12 | 33 | 45 | 27%                                           | 42%                                             |
| Tubular adenoma           | 4  | 29 | 33 | 12%                                           | 22%                                             |
| Diverticulosis            | 21 | 9  | 30 | 70%                                           | 82%                                             |
| Abdominal symp            | 13 | 14 | 27 | 48%                                           | 65%                                             |
| IBS                       | 5  | 10 | 15 | 33%                                           | 50%                                             |
| Time to caecum            | 64 | 21 | 85 | 65%                                           | 86%                                             |
| Pain score                | 16 | 25 | 41 | 39%                                           | 56%                                             |
| Predicted pain            | 17 | 24 | 41 | 41%                                           | 59%                                             |
| Medication                | 76 | 15 | 91 | 84%                                           | 91%                                             |

373 C= Number of concordant pairs, D=Number of Discordant pairs, T= Total number of pairs,

374 P=polyps, Di=diverticulosis.

375

376 **Table 2:** Results from the LMEM used to interrogate the phenotypes from the colonoscopy  
 377 analysis according to the biological covariates: BMI, age and frailty:

378

| Number of Abnormalities (n=190) | Estimate | Std. | t value | Pr(>Chisq) |
|---------------------------------|----------|------|---------|------------|
|---------------------------------|----------|------|---------|------------|

|                                                    |       | <b>Error</b> |       |      |
|----------------------------------------------------|-------|--------------|-------|------|
| Frailty Index                                      | -1.09 | 0.68         | -1.61 | 0.10 |
| Age                                                | 0.03  | 0.01         | 3.60  | ***  |
| BMI                                                | 0.04  | 0.01         | 3.15  | **   |
| <b>Number of Polyps and Diverticulosis (n=190)</b> |       |              |       |      |
| Frailty Index                                      | -0.97 | 0.61         | -1.60 | 0.11 |
| Age                                                | 0.03  | 0.01         | 4.04  | ***  |
| BMI                                                | 0.05  | 0.01         | 4.04  | ***  |
| <b>Number of Polyps (n=188)</b>                    |       |              |       |      |
| Frailty I                                          | -0.81 | 0.52         | -1.56 | 1    |
| Age                                                | 0.02  | 0.01         | 3.30  | **   |
| BMI                                                | 0.03  | 0.01         | 3.16  | **   |
| <b>Number of Diverticulosis locations (n=183)</b>  |       |              |       |      |
| Frailty I                                          | -0.37 | 0.28         | -1.33 | 0.19 |
| Age                                                | 0.01  | 0.01         | 2.02  | *    |
| BMI                                                | 0.01  | 0.01         | 1.52  | 0.13 |

379 Signif. codes: <0.001 '\*\*\*' 0.001 '\*\*' 0.01 '\*' 0.05 '.' 0.1 ' ' 1; **Bonferroni correction: 0.0125**

380

381 **Table 3:** Results from the LMEM and LINCOM test used to interrogate the between and within

382 variation in BMI and frailty:

383

|                                                    | <b>Estimate</b> | <b>Std. Error</b> | <b>t value</b> | <b>Pr(&gt;Chisq)</b> | <b>LINCOM</b>              |
|----------------------------------------------------|-----------------|-------------------|----------------|----------------------|----------------------------|
| <b>Number of Abnormalities (n=184)</b>             |                 |                   |                |                      |                            |
| BMI <sup>b</sup>                                   | 0.03            | 0.01              | 3.50           | <b>0.001 **</b>      | <b>0.005 *</b><br><br>n/a  |
| BMI <sup>w</sup>                                   | -0.00           | 0.01              | -0.16          | 0.876                |                            |
| Frailty <sup>b</sup>                               | -0.23           | 0.52              | -0.43          | 0.668                |                            |
| Frailty <sup>w</sup>                               | 0.16            | 0.50              | 0.32           | 0.750                |                            |
| <b>Number of Polyps and Diverticulosis (n=184)</b> |                 |                   |                |                      |                            |
| BMI <sup>b</sup>                                   | 0.05            | 0.01              | 3.42           | <b>0.001 **</b>      | <b>0.001 **</b><br><br>n/a |
| BMI <sup>w</sup>                                   | -0.06           | 0.03              | -2.37          | 0.020 .              |                            |
| Frailty <sup>b</sup>                               | -0.86           | 0.73              | -1.18          | 0.242                |                            |
| Frailty <sup>w</sup>                               | 0.88            | 0.83              | 1.07           | 0.288                |                            |
| <b>Number of Polyps (n=182)</b>                    |                 |                   |                |                      |                            |
| BMI <sup>b</sup>                                   | 0.03            | 0.01              | 2.23           | 0.028 .              | <b>0.003 *</b><br><br>n/a  |
| BMI <sup>w</sup>                                   | -0.06           | 0.02              | -2.38          | 0.019 .              |                            |
| Frailty <sup>b</sup>                               | -0.82           | 0.65              | -1.26          | 0.211                |                            |
| Frailty <sup>w</sup>                               | 0.11            | 0.88              | 0.12           | 0.904                |                            |
| <b>Number of Diverticulosis (n=178)</b>            |                 |                   |                |                      |                            |
| BMI <sup>b</sup>                                   | 0.02            | 0.01              | 2.25           | 0.027 .              | 0.05 .<br><br>n/a          |
| BMI <sup>w</sup>                                   | -0.01           | 0.01              | -0.79          | 0.430                |                            |
| Frailty <sup>b</sup>                               | 0.28            | 0.67              | 0.42           | 0.678                |                            |
| Frailty <sup>w</sup>                               | 0.71            | 0.38              | 1.88           | 0.063                |                            |



384 Signif. codes: 0 '\*\*\*' 0.001 '\*\*' 0.01 '\*' 0.05 '.' 0.1 ' ' 1; **Bonferroni correction: 0.0125,**

385 LINCOM: LINear COMbinations of estimators

386 **List of figures:**

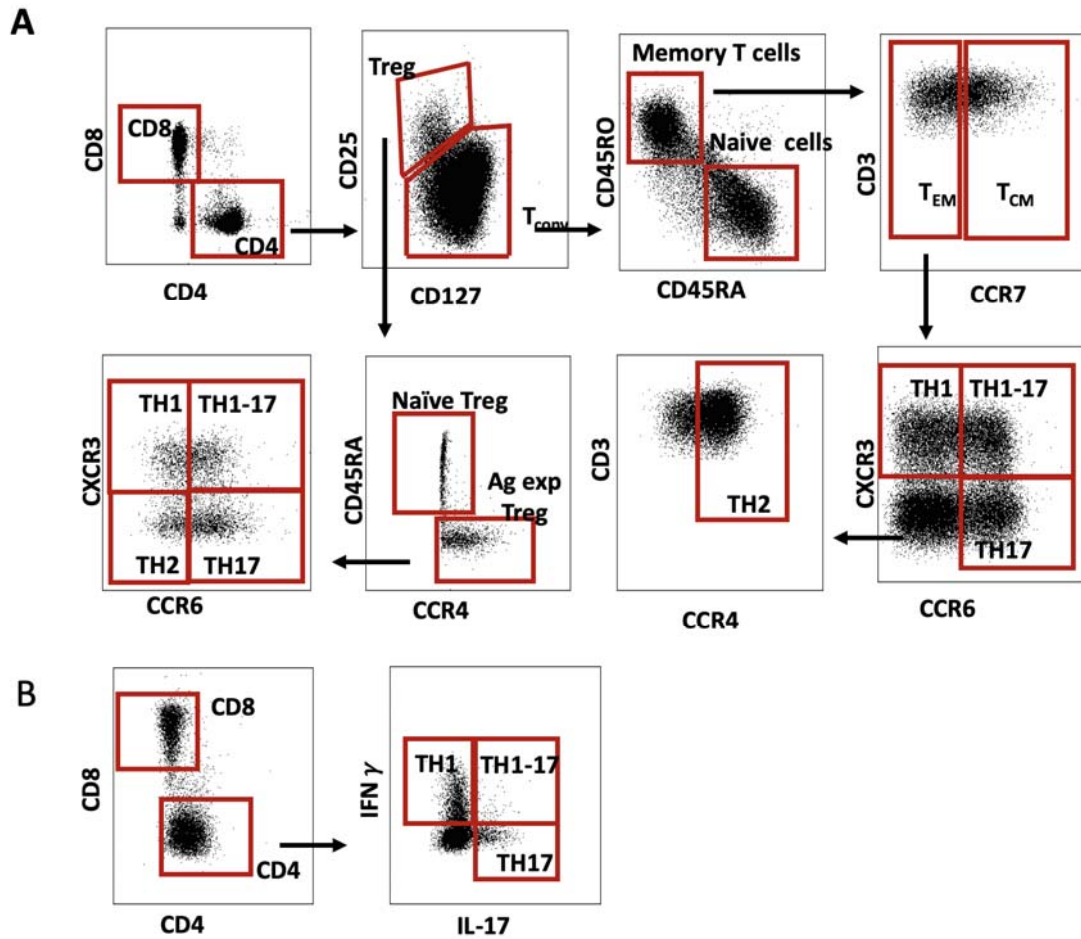

387

388 **Figure 1. Flow cytometric gating strategy.** Panel a) Flowcytometric analysis of peripheral  
 389 blood CD4 T cells (gated on CD3<sup>+</sup> live lymphocytes) which were then divided into  
 390 CD127<sup>high</sup>CD25<sup>low</sup> conventional T cells (T<sub>conv</sub>) and CD127<sup>low</sup>CD25<sup>high</sup> regulatory T cells (Treg).  
 391 T<sub>conv</sub> cells were then divided into naive and memory T cells. CD45RO<sup>+</sup>CD45RA<sup>-</sup> memory T  
 392 cells were subdivided into CCR7<sup>-</sup> effector memory (TEM) and CCR7<sup>+</sup> central memory (TCM) T  
 393 cells. TEM defined Th17 (CCR6<sup>+</sup>CXCR3<sup>-</sup>), Th1 (CXCR3<sup>+</sup>CCR6<sup>-</sup>), Th1-17 (CXCR3<sup>+</sup>CCR6<sup>+</sup>)  
 394 and Th2 (CXCR3<sup>-</sup>CCR6<sup>-</sup>CCR4<sup>+</sup>) cells. Antigen experienced Treg (Ag exp Treg) were defined as  
 395 CD45RA<sup>-</sup>CCR4<sup>+</sup> Treg which were then subdivided into T helper like subsets based on CCR6  
 396 and CXCR3 expression. Panel b) Flow cytometric analysis of lamina propria mononuclear cells-  
 397 CD4 T cells (gated on CD45<sup>+</sup>CD3<sup>+</sup> live lymphocytes) were divided into Th1, Th1-17 and Th17  
 398 cells based on IFN gamma and Il-17 expression.

399

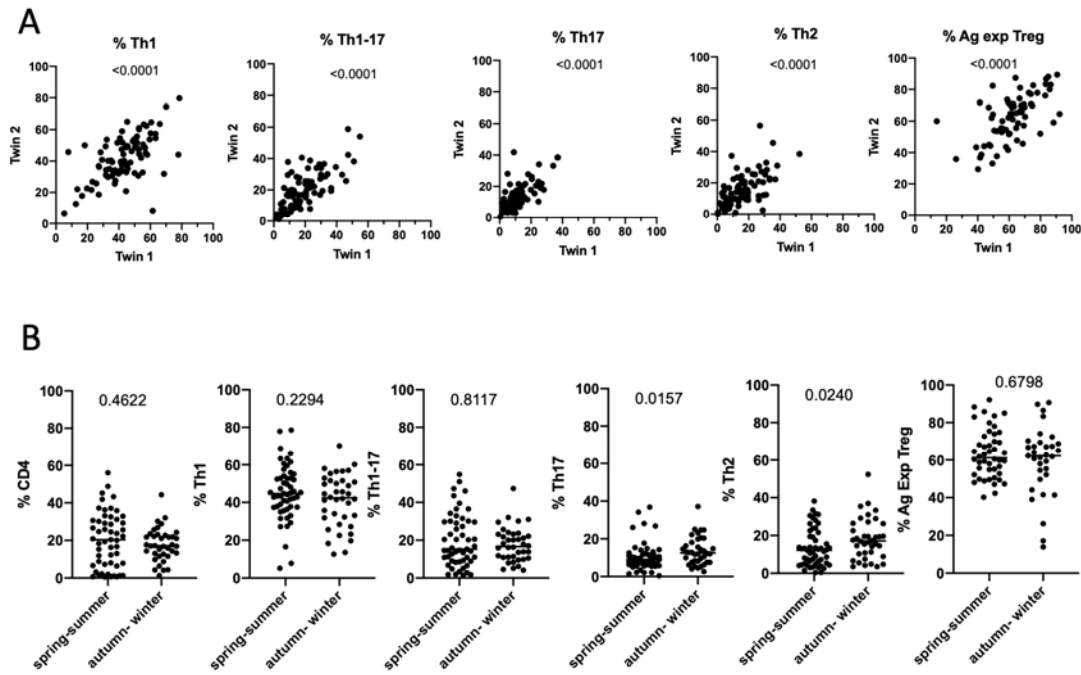

400

401 **Figure 2. Peripheral blood immunophenotyping.** Panel a) Proportion of different T helper  
 402 cell subsets correlate between individual Twin pairs. Panel b) Frequency of CD4 T cells, Th1,  
 403 Th1-17, Th17, Th2 and Ag exp Tregs between samples collected at different seasons.

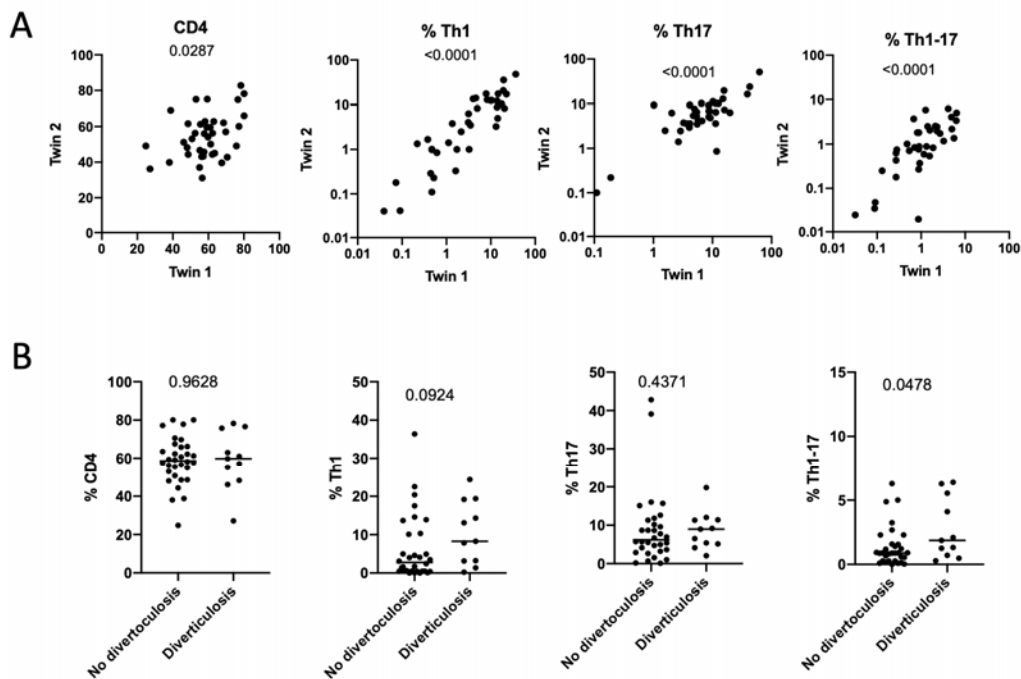

404

405 **Figure 3. Gut immunophenotyping.** Panel a) Proportion of different T helper cell subsets in  
406 the gut correlate between Twin pairs. Panel b) Proportion of CD4 T cells, Th1, Th1-17 and  
407 Th17 between individuals with or without diverticulosis.

#### 408 **Bibliography**

- 409 1. Agur A, Lee M, Grant J. Grant's Atlas of Anatomy. 10th Ed. . London, UK:  
410 Lippincott Williams and Wilkins; 1999.
- 411 2. McGregor A, Decker G. Lee McGregor's synopsis of surgical anatomy. 12th ed.  
412 Bristol: John Wright; 1986.
- 413 3. Krogh D. Biology: A Guide to the Natural World: Benjamin-Cummings Publishing  
414 Company; 2010.
- 415 4. Burrows MP, Volchkov P, Kobayashi KS, Chervonsky AV. Microbiota regulates type  
416 1 diabetes through Toll-like receptors. 2015;112(32):9973-7.
- 417 5. Suau A, Bonnet R, Sutren M, Godon J-J, Gibson GR, Collins MD, et al. Direct  
418 Analysis of Genes Encoding 16S rRNA from Complex Communities Reveals Many Novel  
419 Molecular Species within the Human Gut. 1999;65(11):4799-807.
- 420 6. Savage DC. Microbial Ecology of the Gastrointestinal Tract. 1977;31(1):107-33.
- 421 7. Andersson AF, Lindberg M, Jakobsson H, Bäckhed F, Nyrén P, Engstrand L.  
422 Comparative Analysis of Human Gut Microbiota by Barcoded Pyrosequencing. PLOS ONE.  
423 2008;3(7):e2836.
- 424 8. Yatsunenkov T, Rey FE, Manary MJ, Trehan I, Dominguez-Bello MG, Contreras M, et  
425 al. Human gut microbiome viewed across age and geography. Nature. 2012;486:222.
- 426 9. The Human Microbiome Project C, Huttenhower C, Gevers D, Knight R, Abubucker  
427 S, Badger JH, et al. Structure, function and diversity of the healthy human microbiome.  
428 Nature. 2012;486:207.
- 429 10. Bloom SM, Bijanki VN, Nava GM, Sun L, Malvin NP, Donermeyer DL, et al.  
430 Commensal Bacteroides species induce colitis in host-genotype-specific fashion in a mouse  
431 model of inflammatory bowel disease. Cell host & microbe. 2011;9(5):390-403.
- 432 11. Bottacini F, Ventura M, van Sinderen D, O'Connell Motherway M. Diversity, ecology  
433 and intestinal function of bifidobacteria. Microbial cell factories. 2014;13 Suppl 1(Suppl  
434 1):S4-S.
- 435 12. Ruff WE, Kriegel MA. Autoimmune host&#x2013;microbiota interactions at barrier  
436 sites and beyond. Trends in Molecular Medicine. 2015;21(4):233-44.
- 437 13. Belkaid Y, Naik S. Compartmentalized and systemic control of tissue immunity by  
438 commensals. Nature Immunology. 2013;14:646.
- 439 14. Steegenga WT, de Wit NJ, Boekschoten MV, Ijssennagger N, Lute C, Keshtkar S, et  
440 al. Structural, functional and molecular analysis of the effects of aging in the small intestine  
441 and colon of C57BL/6J mice. BMC Med Genomics. 2012;5:38-.
- 442 15. Moayyeri A, Hammond CJ, Hart DJ, Spector TD. The UK Adult Twin Registry  
443 (TwinsUK Resource). Twin research and human genetics : the official journal of the  
444 International Society for Twin Studies. 2013;16(1):144-9.
- 445 16. Verdi S, Abbasian G, Bowyer RCE, Lachance G, Yarand D, Christofidou P, et al.  
446 TwinsUK: The UK Adult Twin Registry. Twin research and human genetics : the official  
447 journal of the International Society for Twin Studies. 219.
- 448 17. Goodrich Julia K, Waters Jillian L, Poole Angela C, Sutter Jessica L, Koren O,  
449 Blehman R, et al. Human Genetics Shape the Gut Microbiome. Cell. 2014;159(4):789-99.

- 450 18. Grundberg E, Small KS, Hedman ÅK, Nica AC, Buil A, Keildson S, et al. Mapping  
451 cis- and trans-regulatory effects across multiple tissues in twins. *Nature genetics*.  
452 2012;44(10):1084-9.
- 453 19. Jackson MA, Jeffery IB, Beaumont M, Bell JT, Clark AG, Ley RE, et al. Signatures  
454 of early frailty in the gut microbiota. *Genome Medicine*. 2016;8(1):8.
- 455 20. Jackson MA, Verdi S, Maxan M-E, Shin CM, Zierer J, Bowyer RCE, et al. Gut  
456 microbiota associations with common diseases and prescription medications in a population-  
457 based cohort. *Nature Communications*. 2018;9(1):2655.
- 458 21. Carlin JB, Sterne JAC, Gurrin LC, Morley R, Dwyer T. Regression models for twin  
459 studies: a critical review. *International Journal of Epidemiology*. 2005;34(5):1089-99.
- 460 22. Ding X, Hu Y, Guo X, Guo X, Morgan I, He M. Possible Causes of Discordance in  
461 Refraction in Monozygotic Twins: Nearwork, Time Outdoors and Stochastic Variation.  
462 *Invest Ophthalmol Vis Sci*. 2018;59(13):5.
- 463 23. Boomsma D, Busjahn A, Peltonen L. Classical twin studies and beyond. *Nature*  
464 *Reviews Genetics*. 2002;3:10.
- 465 24. Yao MD, von Rosenvinge EC, Groden C, Mannon PJ. Multiple endoscopic biopsies  
466 in research subjects: safety results from a National Institutes of Health series. *Gastrointestinal*  
467 *endoscopy*. 2009;69(4):906-10.
- 468 25. Lieberman DA, Faigel DO, Logan JR, Mattek N, Holub J, Eisen G, et al. Assessment  
469 of the quality of colonoscopy reports: results from a multicenter consortium. *Gastrointestinal*  
470 *endoscopy*. 2009;69(3):645-53.
- 471 26. Pezzoli A, Matarese V, Rubini M, Simoni M, Caravelli G, Stockbrugger R, et al.  
472 Colorectal cancer screening: results of a 5-year program in asymptomatic subjects at  
473 increased risk. *Digestive and liver disease*. 2007;39(1):33-9.
- 474 27. Sinicrope PS, Goode EL, Limburg PJ, Vernon SW, Wick JB, Patten CA, et al. A  
475 Population-Based Study of Prevalence and Adherence Trends in Average Risk Colorectal  
476 Cancer Screening, 1997 to 2008. 2012;21(2):347-50.
- 477 28. FriedenberG FK, Singh M, George NS, Sankineni A, Shah S. Prevalence and  
478 distribution of adenomas in black Americans undergoing colorectal cancer screening.  
479 *Digestive diseases and sciences*. 2012;57(2):489-95.
- 480 29. Blumenstein I, Tacke W, Bock H, Filmann N, Lieber E, Zeuzem S, et al. Prevalence  
481 of colorectal cancer and its precursor lesions in symptomatic and asymptomatic patients  
482 undergoing total colonoscopy: results of a large prospective, multicenter, controlled  
483 endoscopy study. 2013;25(5):556-61.
- 484 30. Brim H, Yooshep S, Zoetendal EG, Lee E, Torralbo M, Laiyemo AO, et al.  
485 Microbiome analysis of stool samples from African Americans with colon polyps. *PLoS one*.  
486 2013;8(12):e81352-e.
- 487 31. Pemberton JH. Clinical manifestations and diagnosis of acute diverticulitis in adults.  
488 In: Lamont JT, Grover S, editors. *uptodate2019*. p. <https://www.uptodate.com>.
- 489 32. Böhm SK. Risk Factors for Diverticulosis, Diverticulitis, Diverticular Perforation, and  
490 Bleeding: A Plea for More Subtle History Taking. *Viszeralmedizin*. 2015;31(2):84-94.
- 491 33. Bowyer RCE, Jackson MA, Le Roy CI, Ni Lochlainn M, Spector TD, Dowd JB, et al.  
492 Socioeconomic Status and the Gut Microbiome: A TwinsUK Cohort Study. *Microorganisms*.  
493 2019;7:17.
- 494 34. Searle SD, Mitnitski A, Gahbauer EA, Gill TM, Rockwood KJBG. A standard  
495 procedure for creating a frailty index. 2008;8(1):24.
- 496 35. Chilton A, Rutter M. Quality assurance guidelines for colonoscopy. *NHS Cancer*  
497 *Screening Programmes*. 2011.
- 498 36. Bates D, Mächler M, Bolker B, Walker S. Fitting Linear Mixed-Effects Models Using  
499 *lme4*. 2015. 2015;67(1):48 %J *Journal of Statistical Software*.

- 500 37. Morris-Yates A, Talley NJ, Boyce PM, Nandurkar S, Andrews G. Evidence of a  
501 genetic contribution to functional bowel disorder. *The American journal of gastroenterology*.  
502 1998;93(8):1311-7.
- 503 38. Levy RL, Jones KR, Whitehead WE, Feld SI, Talley NJ, Corey LA. Irritable bowel  
504 syndrome in twins: heredity and social learning both contribute to etiology. *Gastroenterology*.  
505 2001;121(4):799-804.
- 506 39. Mohammed I, Cherkas LF, Riley SA, Spector TD, Trudgill NJ. Genetic influences in  
507 irritable bowel syndrome: a twin study. *The American journal of gastroenterology*.  
508 2005;100(6):1340.
- 509 40. Granlund J, Svensson T, Olén O, Hjern F, Pedersen NL, Magnusson PKE, et al. The  
510 genetic influence on diverticular disease – a twin study. *Alimentary Pharmacology &  
511 Therapeutics*. 2012;35(9):1103-7.
- 512 41. Strate LL, Erichsen R, Baron JA, Mortensen J, Pedersen JK, Riis AH, et al.  
513 Heritability and Familial Aggregation of Diverticular Disease: A Population-Based Study of  
514 Twins and Siblings. *Gastroenterology*. 2013;144(4):736-42.e1.
- 515 42. Reichert MC, Lammert F. The genetic epidemiology of diverticulosis and diverticular  
516 disease: Emerging evidence. *United European gastroenterology journal*. 2015;3(5):409-18.
- 517 43. Comstock SS, Hortos K, Kovan B, McCaskey S, Pathak DR, Fenton JI. Adipokines  
518 and obesity are associated with colorectal polyps in adult males: a cross-sectional study. *PloS  
519 one*. 2014;9(1):e85939-e.
- 520 44. Ben Q, An W, Jiang Y, Zhan X, Du Y, Cai QC, et al. Body Mass Index Increases  
521 Risk for Colorectal Adenomas Based on Meta-analysis. *Gastroenterology*. 2012;142(4):762-  
522 72.
- 523 45. Omata F, Deshpande GA, Ohde S, Mine T, Fukui T. The association between obesity  
524 and colorectal adenoma: systematic review and meta-analysis. *Scandinavian Journal of  
525 Gastroenterology*. 2013;48(2):136-46.
- 526 46. Rex DK, Lehman GA, Ulbright TM, Smith JJ, Pound DC, Hawes RH, et al. Colonic  
527 neoplasia in asymptomatic persons with negative fecal occult blood tests: influence of age,  
528 gender, and family history. *The American Journal of Gastroenterology*. 1993;88(6):6.
- 529 47. Goodrich JK, Davenport ER, Beaumont M, Jackson MA, Knight R, Ober C, et al.  
530 Genetic Determinants of the Gut Microbiome in UK Twins. *Cell host & microbe*.  
531 2016;19(5):731-43.
- 532 48. Bäckhed F, Manchester JK, Semenkovich CF, Gordon JI. Mechanisms underlying the  
533 resistance to diet-induced obesity in germ-free mice. *Proceedings of the National Academy of  
534 Sciences of the United States of America*. 2007;104(3):979-84.
- 535 49. Hale VL, Chen J, Johnson S, Harrington SC, Yab TC, Smyrk TC, et al. Shifts in the  
536 Fecal Microbiota Associated with Adenomatous Polyps. *Cancer epidemiology, biomarkers &  
537 prevention* : a publication of the American Association for Cancer Research, cosponsored by  
538 the American Society of Preventive Oncology. 2017;26(1):85-94.  
539
